# Supplementary material for: Thickness-dependence of block copolymer coarsening kinetics
Source: Royal Society of Chemistry journal article supplement (doi:10.1039/c7sm00212b), 2017-01-01
Supplement: c7sm00212b1.pdf [file c7sm00212b1.pdf]

## Supplementary Information for: Thickness-Dependence of Block Copolymer Coarsening Kinetics

Charles T. Black<sup>1</sup>, Christopher Forrey<sup>2</sup>, Kevin G. Yager\*<sup>1</sup>

<sup>1</sup>Center for Functional Nanomaterials, Brookhaven National Laboratory, Upton, NY, USA

<sup>2</sup>Center for Devices and Radiological Health, US Food and Drug Administration, Silver Spring MD, USA

email: kyager@bnl.gov

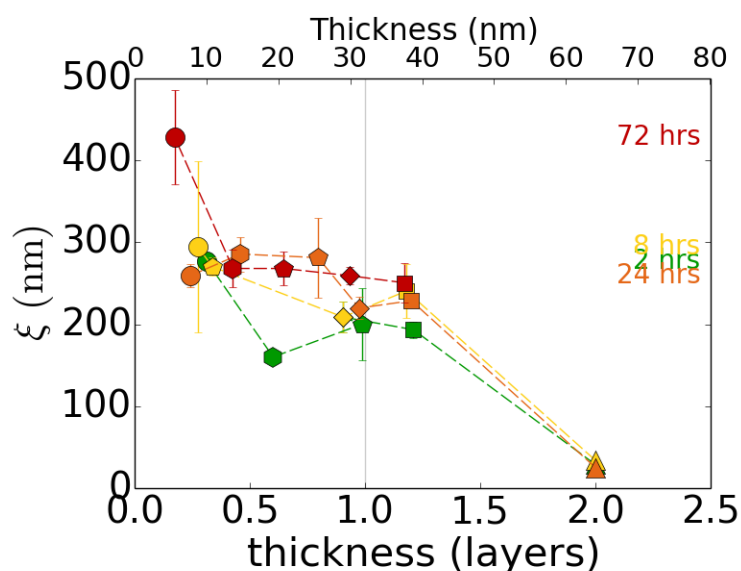

**Figure S1:** Grain sizes ( $\xi$ ) for annealing (205°C) of cylinder-forming PS-*b*-PMMA (67 kg/mol). These results confirm the results shown in Figure 2 of the main text (similar molecular weight of PS-*b*-PMMA, obtained from a completely independent synthesis batch). The grain size ( $\xi$ ) follows a power-law in time.

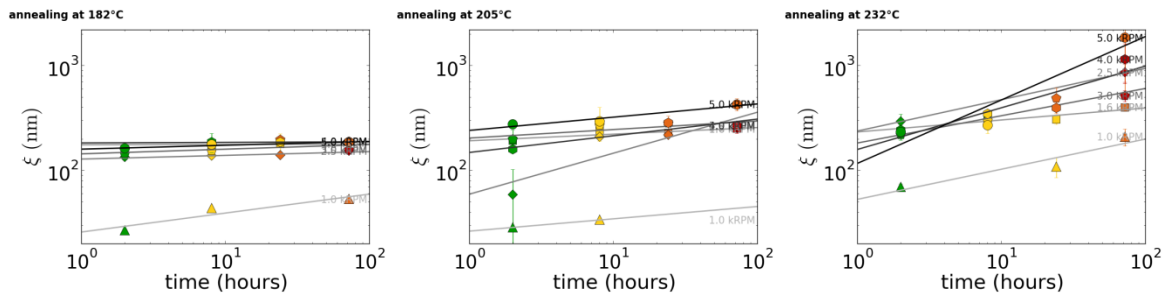

**Figure S2:** Grain coarsening during annealing of cylinder-forming PS-*b*-PMMA (67 kg/mol), for three different annealing temperatures (as indicated). The grain size ( $\xi$ ) follows a power-law in time. As expected, grain sizes are quantitatively larger for higher annealing temperatures. Interestingly, grain sizes are also larger for thinner films than thicker films (spin-coating speeds are indicated alongside the curves; spin-speeds from 1.0 krpm (thicker films) to 5.0 krpm (thinner films) are shown). From the power-law fits (grey lines), we extract rate prefactors ( $k$ ), which can be used in an Arrhenius analysis.

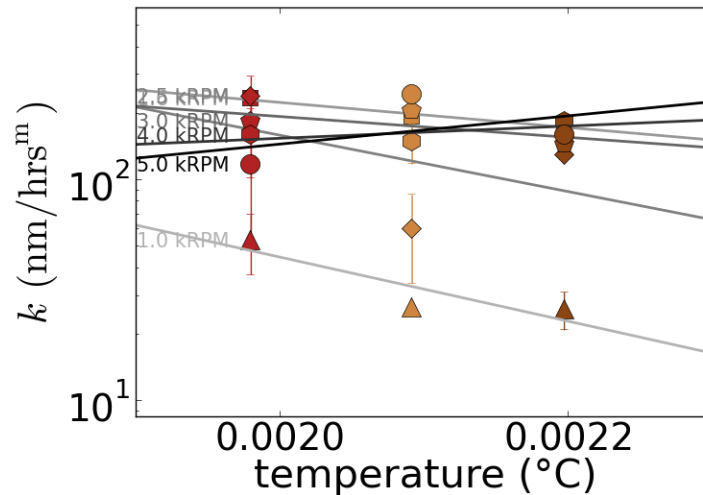

**Figure S3:** Arrhenius analysis of grain coarsening for cylinder-forming PS-*b*-PMMA (67 kg/mol). The ordering rates ( $k$ ) are dependent on temperature ( $T$ ). We plot  $\ln(k)$  vs.  $1/T$ ; the corresponding linear fit returns the Arrhenius activation energy ( $E_a$ ) from the slope. The slopes of the lines are dependent on film thickness (denoted by the spin-coating speed). In particular, for the thinnest films, the activation energies are extremely low (equal to zero, within error); which can be seen the insensitivity to temperature for these data.
